# Supplementary material for: Impact of flour particle size and origin on the bread structure and the postprandial glycemic, insulinemic and appetite responses in healthy adults
Source: Royal Society of Chemistry journal article supplement (doi:10.1039/d5fo00348b), 2025-01-01
Supplement: d5fo00348b1.pdf [file d5fo00348b1.pdf]

**Supplementary Table S1:** Pairwise comparisons between the four bread samples for postprandial glucose, insulin, GLP-1, and subjective appetite sensations (hunger, fullness, and desire to eat), based on estimated marginal means. Values are presented as mean differences with 95% confidence intervals.

| iAUC <sub>180</sub> Glucose | Mean Difference | 95% CI (Lower, Upper)   | <i>p</i> -value |
|-----------------------------|-----------------|-------------------------|-----------------|
| WB vs WGB                   | 268.77          | [-457.40, 994.94]       | 1.000           |
| WB vs CFM                   | 105.03          | [-513.96, 724.01]       | 1.000           |
| <b>WB vs CLP</b>            | <b>669.20</b>   | <b>[10.93, 1327.47]</b> | <b>0.045</b>    |
| WGB vs CFM                  | -163.75         | [-880.11, 552.62]       | 1.000           |
| WGB vs CLP                  | 400.43          | [-183.93, 984.78]       | 0.324           |
| CFM vs CLP                  | 564.17          | [134.24, 994.11]        | 0.007           |

| iAUC <sub>180</sub> Insulin | Mean Difference | 95% CI (Lower, Upper) | <i>p</i> -value |
|-----------------------------|-----------------|-----------------------|-----------------|
| WB vs WGB                   | 416.43          | [-676.64, 1509.50]    | 1.000           |
| WB vs CFM                   | -340.62         | [-1676.47, 995.23]    | 1.000           |
| WB vs CLP                   | -441.01         | [-1911.02, 1028.99]   | 1.000           |
| WGB vs CFM                  | -757.05         | [-2028.27, 514.18]    | 0.534           |
| WGB vs CLP                  | -857.44         | [-2303.65, 588.77]    | 0.542           |
| CFM vs CLP                  | -100.39         | [-1162.44, 961.66]    | 1.000           |

| iAUC <sub>180</sub> GLP-1 | Mean Difference | 95% CI (Lower, Upper)      | <i>p</i> -value |
|---------------------------|-----------------|----------------------------|-----------------|
| WB vs WGB                 | -759.77         | [-1828.16, 308.62]         | 0.280           |
| WB vs CFM                 | -436.90         | [-1027.56, 153.76]         | 0.237           |
| <b>WB vs CLP</b>          | <b>-755.10</b>  | <b>[-1386.65, -123.55]</b> | <b>0.015</b>    |
| WGB vs CFM                | 322.87          | [-858.31, 1504.06]         | 1.000           |
| WGB vs CLP                | 4.67            | [-1210.85, 1220.19]        | 1.000           |
| CFM vs CLP                | -318.20         | [-929.61, 293.21]          | 0.795           |

| iAUC <sub>180</sub> Hunger | Mean Difference | 95% CI (Lower, Upper)  | <i>p</i> -value |
|----------------------------|-----------------|------------------------|-----------------|
| WB vs WGB                  | 167.76          | [−57.17, 392.68]       | 0.229           |
| WB vs CFM                  | <b>240.52</b>   | <b>[50.95, 430.08]</b> | <b>0.010</b>    |
| WB vs CLP                  | <b>322.72</b>   | <b>[73.18, 572.25]</b> | <b>0.008</b>    |
| WGB vs CFM                 | 72.76           | [−114.49, 260.01]      | 1.000           |
| WGB vs CLP                 | 154.96          | [−86.52, 396.45]       | 0.414           |
| CFM vs CLP                 | 82.20           | [−108.92, 273.32]      | 1.000           |

| iAUC <sub>180</sub> Fullness | Mean Difference | 95% CI (Lower, Upper)    | <i>p</i> -value |
|------------------------------|-----------------|--------------------------|-----------------|
| WB vs WGB                    | −148.94         | [−423.72, 125.83]        | 0.711           |
| WB vs CFM                    | −135.55         | [−344.27, 73.17]         | 0.397           |
| WB vs CLP                    | <b>−308.43</b>  | <b>[−561.83, −55.03]</b> | <b>0.013</b>    |
| WGB vs CFM                   | 13.39           | [−234.52, 261.30]        | 1.000           |
| WGB vs CLP                   | −159.49         | [−340.83, 21.86]         | 0.104           |
| CFM vs CLP                   | −172.88         | [−427.58, 81.82]         | 0.336           |

| iAUC <sub>180</sub> Desire to eat | Mean Difference | 95% CI (Lower, Upper) | <i>p</i> -value |
|-----------------------------------|-----------------|-----------------------|-----------------|
| WB vs WGB                         | 103.81          | [−190.13, 397.76]     | 1.000           |
| WB vs CFM                         | 167.12          | [−9.77, 344.00]       | 0.070           |
| WB vs CLP                         | <b>286.68</b>   | <b>[8.89, 564.48]</b> | <b>0.041</b>    |
| WGB vs CFM                        | 63.30           | [−219.95, 346.56]     | 1.000           |
| WGB vs CLP                        | 182.87          | [−19.48, 385.22]      | 0.090           |
| CFM vs CLP                        | 119.57          | [−133.16, 372.30]     | 1.000           |

Bonferroni-adjusted *p*-values were used to assess statistical significance. Statistically significant differences ( $p < 0.05$ ) are indicated in bold
